# Supplementary material for: Theoretical Study about the Effect of Halogen Substitution on the Reactivity of Antitumor 3-Formylchromones and Their Free Radicals
Source: Hindawi journal article supplement (doi:10.1155/2017/9254831), 2017-01-01
Supplement: f1 [file 9254831.f1.doc]

**Supporting Information**

Theoretical Study About the Effect of halogen substitution on the Reactivity of Antitumor 3-Formylchromones and Their Free Radicals

Maximiliano Martínez-Cifuentes1,* Boris Weiss-López2 and Ramiro Araya-Maturana3,*

1 Programa Institucional de Fomento a la Investigación, Desarrollo e Innovación, Universidad Tecnológica Metropolitana, Ignacio Valdivieso 2409, Casilla 9845, Santiago 8940577, Chile.

2 Departamento de Química, Facultad de Ciencias, Universidad de Chile, Las Palmeras 3425, Casilla 653, Santiago 7800003, Chile. bweiss@uchile.cl

3 Instituto de Química de Recursos Naturales, Universidad de Talca, Av. Lircay s/n, Casilla 747, Talca 3460000, Chile.

* Correspondences: mmartinez@utem.cl (M.M.-C.); raraya@utalca.cl (R.A.-M.);

Optimized geometries for all molecules

1. Neutral species

1.1. Gas phase M06-2x/6-311+G(d,p1.2. Water (PCM) M06-2x/6-311+G(d,p)

2. Neutral radical species

2.1. Gas phase M06-2x/6-311+G(d,p)

2.2. Water (PCM) M06-2x/6-311+G(d,p)

3. Radical anion species

3.1 Gas phase M06-2x/6-311+G(d,p)

**1. Neutral species**

**1.1. Gas phase M06-2x/6-311+G(d,p)**

**Molecule 1**

6 4.196301 -0.883752 -0.000532

6 2.100367 0.503762 0.000648

6 1.350250 -0.661926 0.000310

6 3.477798 -1.999887 -0.000829

6 1.443797 1.753411 0.000172

6 -0.046505 -0.549419 -0.000277

6 -0.697562 0.673331 -0.000575

6 0.069405 1.842422 -0.000512

6 -2.181240 0.754598 -0.000897

6 -2.832450 -0.571294 0.000002

6 -2.074320 -1.690282 -0.000055

1 5.279784 -0.945258 -0.001374

1 3.980437 -2.961674 -0.001929

1 -0.451343 2.794585 -0.000850

1 -2.505982 -2.686186 0.000249

8 -0.747751 -1.736175 -0.000485

6 3.605031 0.493195 0.001189

1 3.964635 1.060733 -0.865119

1 3.963987 1.058082 0.869537

6 1.978250 -2.032140 0.000262

1 1.618883 -2.593856 0.870389

1 1.617620 -2.594151 -0.869134

8 -5.136257 0.073638 0.001476

8 -2.765613 1.812638 -0.001812

8 2.255257 2.846860 0.000733

1 1.724650 3.648723 -0.000265

6 -4.297712 -0.782160 0.000816

1 -4.586223 -1.855838 0.000864

**Molecule 2**

6 3.699430 -0.109765 -0.000011

6 1.401848 0.968170 0.000316

6 0.829000 -0.291365 0.000324

6 3.148200 -1.325521 -0.000032

6 0.572580 2.110768 0.000092

6 -0.568921 -0.384170 0.000107

6 -1.390310 0.731819 -0.000130

6 -0.800077 1.999473 -0.000138

6 -2.869713 0.597861 -0.000338

6 -3.322155 -0.807818 -0.000067

6 -2.410427 -1.806142 0.000112

1 -1.452590 2.866706 -0.000308

1 -2.694907 -2.853738 0.000240

8 -1.091560 -1.660017 0.000159

6 2.889850 1.159710 0.000622

1 3.168238 1.773434 -0.865874

1 3.167990 1.772396 0.867947

6 1.658054 -1.545142 0.000513

1 1.384913 -2.157211 0.869866

1 1.384424 -2.157752 -0.868291

8 -5.695066 -0.502438 0.000150

8 -3.602178 1.560022 -0.000686

8 1.216581 3.310890 0.000164

1 0.573845 4.025681 -0.000207

6 -4.741191 -1.228115 0.000038

1 -4.871228 -2.332545 0.000029

6 5.184873 0.126744 -0.000535

1 5.476410 0.710520 -0.879758

1 5.476816 0.711891 0.877635

1 5.762038 -0.796052 0.000054

6 3.964812 -2.599947 -0.000504

1 4.606187 -2.667043 -0.882798

1 4.606654 -2.667379 0.881431

1 3.313855 -3.475918 -0.000483

**Molecule 3**

6 4.307771 -1.103284 -0.000231

6 2.169657 0.214691 0.000166

6 1.455803 -0.970038 0.000066

6 3.623998 -2.240740 -0.000344

6 1.482229 1.441804 0.000148

6 0.057828 -0.900165 -0.000062

6 -0.661323 0.294003 -0.000139

6 0.094969 1.480753 -0.000019

6 -2.158333 0.259641 -0.000383

6 -2.715327 -1.110352 -0.000034

6 -1.894108 -2.178066 0.000012

1 -2.255570 -3.201337 0.000132

8 -0.568914 -2.126009 -0.000082

6 3.674051 0.254402 0.000358

1 4.013190 0.832765 -0.866765

1 4.012966 0.831898 0.868161

6 2.126129 -2.320422 0.000123

1 1.785201 -2.893291 0.870090

1 1.784669 -2.893657 -0.869381

8 -5.059628 -0.614174 0.000490

8 -2.848031 1.248515 -0.000831

8 2.247696 2.554374 0.000332

1 1.680536 3.336043 0.000180

6 -4.166286 -1.411713 0.000219

1 -4.381742 -2.502690 0.000186

17 -0.631696 3.061320 0.000014

1 4.155759 -3.186630 -0.000802

1 5.392506 -1.130290 -0.000594

**Molecule 4**

6 -3.894860 -0.115403 0.000554

6 -1.518029 0.770037 -0.000305

6 -1.048790 -0.528244 -0.000143

6 -3.444000 -1.371386 0.000683

6 -0.607108 1.841718 -0.000433

6 0.335699 -0.733232 -0.000074

6 1.272528 0.298656 -0.000054

6 0.761357 1.610150 -0.000267

6 2.733895 -0.024978 0.000378

6 3.014859 -1.477020 -0.000251

6 2.002048 -2.365635 -0.000281

1 2.158520 -3.439511 -0.000501

8 0.712060 -2.057429 -0.000043

6 -2.985198 1.084258 -0.000436

1 -3.211219 1.719115 0.865874

1 -3.211365 1.717707 -0.867754

6 -1.976477 -1.710952 -0.000015

1 -1.753348 -2.343022 -0.869102

1 -1.752654 -2.343347 0.868641

8 5.411076 -1.444400 -0.001134

8 3.602192 0.811262 0.001239

8 -1.142817 3.081855 -0.000735

1 -0.434920 3.738515 -0.000719

6 4.379849 -2.053693 -0.000712

1 4.380303 -3.165780 -0.000742

6 -5.356402 0.239716 0.001339

1 -5.601097 0.844706 0.880466

1 -5.601830 0.845548 -0.876996

1 -6.004760 -0.634722 0.001193

6 -4.359013 -2.576869 0.001497

1 -5.003115 -2.593388 0.884055

1 -5.003820 -2.593996 -0.880539

1 -3.778231 -3.500888 0.001574

17 1.782076 3.017413 -0.000527

**1.2. Water (PCM) M06-2x/6-311+G(d,p)**

**Molecule 1**

6 4.192653 -0.889422 -0.000039

6 2.098900 0.504534 0.000202

6 1.347716 -0.660483 -0.000102

6 3.470841 -2.004448 -0.000381

6 1.444144 1.757749 0.000144

6 -0.048809 -0.544980 -0.000395

6 -0.700167 0.679454 -0.000483

6 0.069141 1.849248 -0.000234

6 -2.177999 0.748068 -0.000829

6 -2.827238 -0.569926 -0.000107

6 -2.067735 -1.695845 -0.000221

1 5.276180 -0.950546 -0.000278

1 3.968890 -2.968646 -0.000914

1 -0.436946 2.808127 -0.000304

1 -2.496902 -2.692106 0.000016

8 -0.749050 -1.728900 -0.000518

6 3.603783 0.489470 0.000661

1 3.966279 1.053289 -0.866682

1 3.965680 1.052165 0.869001

6 1.971124 -2.033026 -0.000067

1 1.610752 -2.593860 0.869740

1 1.610384 -2.594105 -0.869548

8 -5.130746 0.072348 0.001751

8 -2.773234 1.811645 -0.001255

8 2.255033 2.848383 0.000510

1 1.730885 3.656909 0.000136

6 -4.282715 -0.787716 0.000936

1 -4.573053 -1.855099 0.000420

**Molecule 2**

6 3.697329 -0.111005 0.000305

6 1.400057 0.970357 -0.000017

6 0.827461 -0.289501 -0.000360

6 3.144654 -1.326942 -0.000153

6 0.570833 2.115539 -0.000108

6 -0.570613 -0.380570 -0.000669

6 -1.393644 0.736193 -0.000869

6 -0.802632 2.005597 -0.000638

6 -2.865348 0.589353 -0.001260

6 -3.316002 -0.808618 0.000076

6 -2.401343 -1.812801 -0.000061

1 -1.442207 2.881170 -0.000799

1 -2.681974 -2.860711 0.000394

8 -1.091770 -1.654162 -0.000725

6 2.888406 1.159617 0.000550

1 3.169102 1.771026 -0.866812

1 3.168522 1.770344 0.868584

6 1.653995 -1.545097 -0.000370

1 1.379846 -2.156883 0.868450

1 1.380050 -2.156693 -0.869386

8 -5.687492 -0.503266 0.003720

8 -3.609515 1.554799 -0.002506

8 1.213167 3.313588 0.000377

1 0.573515 4.033791 0.000417

6 -4.724989 -1.233166 0.001846

1 -4.859115 -2.331361 0.001572

6 5.182900 0.125964 0.000562

1 5.473565 0.711190 -0.878012

1 5.473235 0.711320 0.879155

1 5.759002 -0.797508 0.000738

6 3.959271 -2.602782 -0.000444

1 4.601871 -2.669438 -0.881836

1 4.601519 -2.670072 0.881158

1 3.305959 -3.476662 -0.000878

**Molecule 3**

6 4.302100 -1.112728 -0.000391

6 2.167392 0.212751 0.000032

6 1.451797 -0.970142 0.000128

6 3.614155 -2.248588 -0.000300

6 1.481657 1.443591 0.000103

6 0.053505 -0.896829 0.000246

6 -0.665678 0.298154 0.000291

6 0.095268 1.484549 0.000222

6 -2.155662 0.254580 0.000369

6 -2.711894 -1.107236 0.000043

6 -1.889108 -2.181723 0.000105

1 -2.248883 -3.204807 -0.000050

8 -0.572513 -2.118999 0.000197

6 3.671918 0.247283 -0.000132

1 4.014112 0.822038 -0.868311

1 4.014304 0.821802 0.868131

6 2.116219 -2.323168 0.000083

1 1.773519 -2.894603 0.869853

1 1.773077 -2.894785 -0.869388

8 -5.056390 -0.616904 -0.000456

8 -2.853326 1.249612 -0.001002

8 2.252082 2.552209 0.000072

1 1.699492 3.345184 0.000078

6 -4.152268 -1.416363 -0.000361

1 -4.368720 -2.501379 -0.000456

17 -0.624678 3.071285 0.000483

1 4.140593 -3.197428 -0.000511

1 5.386807 -1.140002 -0.000676

**Molecule 4**

6 -3.892309 -0.116284 0.000409

6 -1.515478 0.771510 -0.000090

6 -1.047201 -0.526655 0.000282

6 -3.440465 -1.372581 0.000795

6 -0.603319 1.845370 -0.000357

6 0.337883 -0.731511 0.000383

6 1.276569 0.299530 0.000354

6 0.764110 1.612770 -0.000060

6 2.728348 -0.034155 0.001010

6 3.008893 -1.477979 -0.000341

6 1.992253 -2.371646 -0.000228

1 2.144845 -3.445297 -0.000713

8 0.712723 -2.052540 0.000425

6 -2.982999 1.084426 -0.000353

1 -3.211105 1.716935 0.867062

1 -3.211047 1.715754 -0.868652

6 -1.972558 -1.710999 0.000539

1 -1.748015 -2.342329 -0.868229

1 -1.747700 -2.342164 0.869339

8 5.404322 -1.450142 -0.003040

8 3.606428 0.805713 0.002407

8 -1.141793 3.083875 -0.000925

1 -0.444371 3.752820 -0.001048

6 4.362508 -2.060044 -0.001735

1 4.365135 -3.166403 -0.001765

6 -5.353730 0.240003 0.000661

1 -5.596923 0.846108 0.879451

1 -5.597155 0.846341 -0.877901

1 -6.001364 -0.635001 0.000631

6 -4.353783 -2.579458 0.001479

1 -4.998788 -2.595193 0.883340

1 -4.999123 -2.595913 -0.880126

1 -3.770624 -3.501667 0.001741

17 1.782968 3.024528 -0.000621

**2. Neutral radical species**

**2.1. Gas phase M06-2x/6-311+G(d,p)**

**Molecule 1**

6 4.235146 -0.821915 -0.000462

6 2.134932 0.546009 0.000220

6 1.399289 -0.608311 0.000152

6 3.522943 -1.942304 -0.000579

6 1.474901 1.857902 0.000176

6 -0.015244 -0.499071 0.000060

6 -0.701838 0.720845 -0.000007

6 0.033150 1.889567 0.000027

6 -2.193525 0.758636 -0.000062

6 -2.811312 -0.586684 -0.000083

6 -2.025721 -1.680374 -0.000010

1 5.318764 -0.877273 -0.001078

1 4.028954 -2.902086 -0.001300

1 -0.471020 2.848946 -0.000036

1 -2.419140 -2.691127 -0.000022

8 -0.687107 -1.683258 0.000023

6 3.632765 0.550377 0.000456

1 3.980583 1.128242 -0.863779

1 3.980250 1.126885 0.865758

6 2.022510 -1.981734 0.000205

1 1.663672 -2.542578 0.870978

1 1.662781 -2.543088 -0.869856

8 -5.127807 0.005276 0.000424

8 -2.807102 1.795764 -0.000768

8 2.146441 2.901461 0.000263

6 -4.275023 -0.834286 -0.000108

1 -4.538087 -1.913815 -0.000118

**Molecule 2**

6 -3.719812 -0.073189 0.000045

6 -1.427714 0.998791 -0.000214

6 -0.859572 -0.244902 -0.000246

6 -3.168127 -1.289066 0.000044

6 -0.594498 2.206924 -0.000082

6 0.555440 -0.334315 -0.000161

6 1.404517 0.779569 -0.000034

6 0.837614 2.038564 0.000021

6 2.886897 0.611236 0.000017

6 3.312891 -0.806105 -0.000005

6 2.383765 -1.781420 -0.000133

1 1.469688 2.918829 0.000117

1 2.635185 -2.836646 -0.000164

8 1.057892 -1.600366 -0.000206

6 -2.907843 1.194697 -0.000366

1 -3.177160 1.815999 0.863629

1 -3.177057 1.815350 -0.864869

6 -1.676890 -1.507069 -0.000328

1 -1.400645 -2.117000 -0.870163

1 -1.400295 -2.117312 0.869169

8 5.688108 -0.537205 0.000082

8 3.638187 1.553708 0.000452

8 -1.114424 3.334371 -0.000070

6 4.728119 -1.252270 0.000070

1 4.841158 -2.357763 0.000156

6 -5.204756 0.163345 0.000464

1 -5.495314 0.747887 0.879342

1 -5.495640 0.748964 -0.877585

1 -5.782204 -0.759219 0.000009

6 -3.982705 -2.564538 0.000387

1 -4.623999 -2.632092 0.882615

1 -4.624420 -2.632302 -0.881520

1 -3.331365 -3.440276 0.000328

**Molecule 3**

6 4.353490 -1.031972 -0.000161

6 2.209517 0.261491 0.000090

6 1.512110 -0.909368 0.000017

6 3.677492 -2.174324 -0.000241

6 1.517164 1.551184 0.000126

6 0.091437 -0.847546 -0.000035

6 -0.665237 0.334384 -0.000055

6 0.051144 1.535370 0.000036

6 -2.164589 0.250616 -0.000216

6 -2.682391 -1.137779 -0.000021

6 -1.831604 -2.176253 0.000006

1 -2.149780 -3.213166 0.000071

8 -0.499475 -2.073230 -0.000057

6 3.706564 0.319352 0.000178

1 4.033678 0.908150 -0.864627

1 4.033585 0.907653 0.865364

6 2.179217 -2.262051 0.000009

1 1.838877 -2.834679 0.870366

1 1.838589 -2.834827 -0.870131

8 -5.038074 -0.705303 0.000288

8 -2.887801 1.212142 -0.000669

8 2.153172 2.605385 0.000233

6 -4.127651 -1.481284 0.000109

1 -4.313218 -2.577071 0.000055

17 -0.689178 3.065313 0.000139

1 4.213517 -3.117597 -0.000502

1 5.438238 -1.051657 -0.000357

**Molecule 4**

6 -3.917657 -0.082734 0.000604

6 -1.548516 0.800464 -0.000168

6 -1.079723 -0.477052 -0.000010

6 -3.463122 -1.337682 0.000753

6 -0.632501 1.941403 -0.000409

6 0.327018 -0.680520 -0.000045

6 1.288283 0.341746 -0.000116

6 0.805518 1.654196 -0.000333

6 2.746158 -0.015738 0.000202

6 2.999947 -1.475904 -0.000302

6 1.972303 -2.340199 -0.000267

1 2.094600 -3.417797 -0.000438

8 0.681826 -1.994253 -0.000010

6 -3.008140 1.116830 -0.000191

1 -3.226351 1.757706 0.863783

1 -3.226551 1.756634 -0.864920

6 -1.993342 -1.671397 0.000224

1 -1.764988 -2.300999 -0.869296

1 -1.764418 -2.301074 0.869530

8 5.395474 -1.486442 -0.001143

8 3.633464 0.796567 0.001008

8 -1.062126 3.095401 -0.000658

6 4.356889 -2.080334 -0.000717

1 4.336849 -3.191553 -0.000687

6 -5.379681 0.268576 0.001189

1 -5.624876 0.873618 0.879985

1 -5.625409 0.874291 -0.876990

1 -6.026266 -0.607176 0.001051

6 -4.373120 -2.546818 0.001432

1 -5.017237 -2.565440 0.883878

1 -5.017773 -2.565992 -0.880614

1 -3.789563 -3.469152 0.001537

17 1.815353 3.022219 -0.000675

**2.1. Water (PCM) M06-2x/6-311+G(d,p)**

**Molecule 1**

6 4.233462 -0.824033 -0.000213

6 2.134468 0.548083 0.000127

6 1.399078 -0.605583 0.000018

6 3.518210 -1.943247 -0.000344

6 1.470838 1.856989 0.000160

6 -0.017003 -0.497706 -0.000041

6 -0.705852 0.721847 -0.000025

6 0.029594 1.889395 0.000056

6 -2.192123 0.750373 -0.000077

6 -2.806306 -0.587243 -0.000072

6 -2.017981 -1.685266 -0.000107

1 5.317114 -0.877878 -0.000466

1 4.020306 -2.905048 -0.000709

1 -0.470864 2.850289 0.000065

1 -2.407347 -2.696717 -0.000134

8 -0.685042 -1.676120 -0.000113

6 3.632664 0.549974 0.000263

1 3.983511 1.122319 -0.866405

1 3.983326 1.121624 0.867475

6 2.018219 -1.979645 -0.000023

1 1.657630 -2.539027 0.870400

1 1.657261 -2.539157 -0.870202

8 -5.120544 0.004623 0.000330

8 -2.810022 1.795000 -0.000248

8 2.136945 2.908839 0.000239

6 -4.261265 -0.840850 0.000001

1 -4.527660 -1.913671 -0.000017

**Molecule 2**

6 -3.718637 -0.073637 0.000156

6 -1.427169 1.002312 0.000046

6 -0.859711 -0.240971 0.000003

6 -3.164646 -1.289023 0.000104

6 -0.589912 2.206607 -0.000008

6 0.556551 -0.333003 -0.000077

6 1.408421 0.779744 -0.000146

6 0.841782 2.037917 -0.000123

6 2.884209 0.601975 -0.000245

6 3.306439 -0.807446 -0.000088

6 2.373883 -1.786372 -0.000046

1 1.471038 2.919770 -0.000169

1 2.619910 -2.842069 0.000033

8 1.055079 -1.593130 -0.000070

6 -2.908057 1.196343 0.000165

1 -3.181105 1.812111 0.867006

1 -3.181231 1.812196 -0.866575

6 -1.673288 -1.504403 0.000055

1 -1.394430 -2.112699 -0.869495

1 -1.394363 -2.112671 0.869606

8 5.679359 -0.538939 0.000172

8 3.641323 1.550961 -0.000441

8 -1.102415 3.341795 0.000041

6 4.712078 -1.258849 0.000048

1 4.828640 -2.358120 0.000086

6 -5.203751 0.162943 0.000209

1 -5.493950 0.748268 0.878800

1 -5.494024 0.748131 -0.878449

1 -5.779247 -0.760838 0.000303

6 -3.976410 -2.566276 0.000102

1 -4.618509 -2.633826 0.881692

1 -4.618432 -2.633861 -0.881543

1 -3.321754 -3.439041 0.000147

**Molecule 3**

6 4.352302 -1.032101 -0.000138

6 2.208742 0.264136 0.000005

6 1.512453 -0.906732 -0.000033

6 3.674045 -2.173827 -0.000161

6 1.511798 1.549840 0.000098

6 0.090797 -0.847560 -0.000048

6 -0.669594 0.333991 -0.000032

6 0.047967 1.530908 0.000105

6 -2.162533 0.240093 -0.000222

6 -2.676638 -1.140131 -0.000063

6 -1.822168 -2.182076 -0.000016

1 -2.134700 -3.219884 0.000051

8 -0.496484 -2.066364 -0.000058

6 3.706184 0.320686 -0.000001

1 4.035843 0.904357 -0.867227

1 4.035855 0.904185 0.867337

6 2.176215 -2.259637 -0.000055

1 1.834197 -2.830610 0.870153

1 1.834075 -2.830657 -0.870182

8 -5.030511 -0.709304 -0.000076

8 -2.889327 1.209332 -0.000462

8 2.141925 2.612603 0.000187

6 -4.112527 -1.489910 -0.000011

1 -4.300801 -2.579404 0.000100

17 -0.692668 3.070832 0.000410

1 4.206789 -3.118884 -0.000262

1 5.437021 -1.049463 -0.000221

**Molecule 4**

6 -3.916736 -0.080720 0.000375

6 -1.547408 0.804218 -0.000098

6 -1.080438 -0.473463 0.000342

6 -3.461040 -1.335750 0.000858

6 -0.626826 1.939875 -0.000458

6 0.326687 -0.680567 0.000410

6 1.292042 0.340089 0.000397

6 0.808435 1.649157 -0.000073

6 2.741663 -0.026943 0.001096

6 2.992577 -1.478662 -0.000394

6 1.960424 -2.345100 -0.000308

1 2.076232 -3.422475 -0.000868

8 0.678548 -1.987203 0.000413

6 -3.007571 1.120316 -0.000356

1 -3.229288 1.756621 0.866136

1 -3.229223 1.755492 -0.867701

6 -1.991307 -1.668402 0.000706

1 -1.760386 -2.296515 -0.868533

1 -1.760134 -2.296141 0.870145

8 5.385923 -1.492563 -0.003526

8 3.634220 0.791926 0.002945

8 -1.048526 3.101457 -0.001003

6 4.338799 -2.088931 -0.001893

1 4.321354 -3.194510 -0.001789

6 -5.378515 0.272129 0.000490

1 -5.622647 0.877980 0.879139

1 -5.622808 0.877835 -0.878213

1 -6.024095 -0.604356 0.000621

6 -4.369408 -2.546043 0.001566

1 -5.014131 -2.563591 0.883526

1 -5.014482 -2.564347 -0.880123

1 -3.783247 -3.466301 0.001841

17 1.821957 3.024950 -0.000633

**3. Radical anion species**

**3.1. Gas phase M06-2x/6-311+G(d,p)**

**Molecule 1**

6 4.218758 -0.840426 -0.000347

6 2.102934 0.524286 0.000155

6 1.359897 -0.658700 0.000102

6 3.511161 -1.965838 -0.000427

6 1.427672 1.744722 0.000231

6 -0.040619 -0.593983 0.000115

6 -0.710235 0.628595 0.000168

6 0.043631 1.799173 0.000233

6 -2.213906 0.711629 0.000162

6 -2.849642 -0.569461 0.000016

6 -2.086199 -1.767468 0.000277

1 5.304521 -0.892858 -0.000652

1 4.031254 -2.920418 -0.000802

1 -0.503258 2.738426 0.000291

1 -2.497138 -2.763981 0.000002

8 -0.697382 -1.781238 0.000017

6 3.610709 0.530517 0.000146

1 3.970941 1.097456 -0.867571

1 3.970955 1.096822 0.868279

6 2.012391 -2.016175 -0.000025

1 1.660439 -2.589215 0.866954

1 1.659957 -2.589277 -0.866761

8 -5.168977 0.099094 -0.000345

8 -2.744174 1.829876 -0.000341

8 2.204925 2.887802 0.000332

1 1.614008 3.644601 -0.000120

6 -4.284472 -0.741188 -0.000279

1 -4.579306 -1.819918 -0.000078

**Molecule 2**

6 3.709836 -0.084667 -0.000039

6 1.401775 0.977776 0.000186

6 0.833247 -0.294915 0.000217

6 3.165959 -1.304787 -0.000038

6 0.562647 2.092530 0.000061

6 -0.562114 -0.430749 0.000116

6 -1.396959 0.685738 -0.000021

6 -0.815004 1.950843 -0.000046

6 -2.897372 0.555416 -0.000152

6 -3.346050 -0.802540 -0.000026

6 -2.420944 -1.881222 0.000204

1 -1.488091 2.804355 -0.000151

1 -2.686715 -2.926110 0.000284

8 -1.043360 -1.698876 0.000174

6 2.891547 1.179703 0.000348

1 3.174505 1.792013 -0.867079

1 3.174396 1.791403 0.868252

6 1.678552 -1.535987 0.000323

1 1.412322 -2.157120 0.866759

1 1.411954 -2.157475 -0.865735

8 -5.736578 -0.468200 -0.000118

8 -3.581196 1.586379 -0.000251

8 1.171246 3.334076 0.000084

1 0.479266 3.999604 -0.000020

6 -4.742054 -1.175246 -0.000049

1 -4.881310 -2.284813 -0.000004

6 5.196213 0.157789 -0.000434

1 5.485570 0.744653 -0.879307

1 5.485886 0.745425 0.877817

1 5.779572 -0.762349 -0.000136

6 3.997460 -2.571946 -0.000382

1 4.640357 -2.635889 -0.882998

1 4.640701 -2.636145 0.881966

1 3.350270 -3.450982 -0.000379

**Molecule 3**

6 4.299299 -1.157904 0.000244

6 2.196345 0.212326 0.000031

6 1.428560 -0.978258 -0.000201

6 3.587363 -2.281366 0.000007

6 1.511489 1.423515 0.000061

6 0.056458 -0.898764 -0.000400

6 -0.699789 0.309505 -0.000475

6 0.118689 1.481830 -0.000191

6 -2.143775 0.298717 -0.000900

6 -2.719411 -1.070461 -0.000192

6 -1.929555 -2.164664 -0.000218

1 -2.311398 -3.180016 0.000128

8 -0.591383 -2.139051 -0.000445

6 3.699659 0.216060 0.000307

1 4.076733 0.774002 -0.867982

1 4.076419 0.773781 0.868877

6 2.087588 -2.335607 -0.000229

1 1.746514 -2.913330 0.868188

1 1.746779 -2.913171 -0.868857

8 -5.104289 -0.661618 0.001029

8 -2.873351 1.312157 -0.000111

8 2.276195 2.557132 0.000354

1 1.674915 3.312142 0.000383

6 -4.153963 -1.402133 0.000601

1 -4.328242 -2.505505 0.000797

17 -0.580165 3.096554 0.000046

1 4.104984 -3.237687 -0.000018

1 5.384992 -1.217372 0.000407

**Molecule 4**

6 -3.894860 -0.115403 0.000554

6 -1.518029 0.770037 -0.000305

6 -1.048790 -0.528244 -0.000143

6 -3.444000 -1.371386 0.000683

6 -0.607108 1.841718 -0.000433

6 0.335699 -0.733232 -0.000074

6 1.272528 0.298656 -0.000054

6 0.761357 1.610150 -0.000267

6 2.733895 -0.024978 0.000378

6 3.014859 -1.477020 -0.000251

6 2.002048 -2.365635 -0.000281

1 2.158520 -3.439511 -0.000501

8 0.712060 -2.057429 -0.000043

6 -2.985198 1.084258 -0.000436

1 -3.211219 1.719115 0.865874

1 -3.211365 1.717707 -0.867754

6 -1.976477 -1.710952 -0.000015

1 -1.753348 -2.343022 -0.869102

1 -1.752654 -2.343347 0.868641

8 5.411076 -1.444399 -0.001134

8 3.602192 0.811262 0.001239

8 -1.142817 3.081855 -0.000735

1 -0.434920 3.738515 -0.000719

6 4.379849 -2.053693 -0.000712

1 4.380303 -3.165780 -0.000742

6 -5.356402 0.239715 0.001339

1 -5.601097 0.844705 0.880466

1 -5.601830 0.845547 -0.876996

1 -6.004760 -0.634723 0.001193

6 -4.359013 -2.576869 0.001497

1 -5.003115 -2.593389 0.884055

1 -5.003820 -2.593997 -0.880539

1 -3.778231 -3.500888 0.001574

17 1.782076 3.017413 -0.000527
